# Supplementary material for: Versatile robust organogels based on a low molecular weight gelator of phenylquinolinylacrylonitrile
Source: Royal Society of Chemistry journal article supplement (doi:10.1039/d3tc00740e), 2023-01-01
Supplement: d3tc00740e1.pdf [file d3tc00740e1.pdf]

## Supporting Information

# Versatile robust organogels based on low molecular weight gelator of phenylquinolinylacrylonitrile

Cheng Liu, Kaiqi Ye\*, Huan Xiao, Yuan Yue, Jingbo Sun, and Ran Lu\*

State Key Laboratory of Supramolecular Structure and Materials, College of

Chemistry, Jilin University, Changchun, China.

E-mail: yekq@jlu.edu.cn; luran@mail.jlu.edu.cn

## EXPERIMENTAL SECTION

### General Information

The reagents were commercially available and used as supplied without purification.  $^1\text{H}$  NMR and  $^{13}\text{C}$  NMR spectra were recorded with a Bruker-Avance III 400 MHz and 101 MHz spectrometers with  $\text{CDCl}_3$  and  $\text{DMSO-}d_6$  as solvents and tetramethylsilane (TMS) as the internal standard. The samples for irradiation time-dependent  $^1\text{H}$  NMR measurements were gained via the irradiation of the solution, gels or crystals of **1**, **2** and **3** by 365 nm ( $16.7 \text{ mW/cm}^2$ ) light for different times, followed by removing the solvent and then dissolving in  $\text{DMSO-}d_6$  or directly dissolving in  $\text{DMSO-}d_6$ . FT-IR spectra were obtained with a Nicolet-360 FT-IR spectrometer by the incorporation of samples into KBr disks. HPLC-MS was measured on Bruker esquire HCT apparatus. UV-vis absorption spectra were measured by a Shimadzu UV-1601PC spectrophotometer. Fluorescence emission spectra were taken on a Shimadzu RF-5301 luminescence spectrometer. X-ray diffraction patterns were obtained on Empyrean XRD equipped with graphite monochromatized  $\text{Cu-K}\alpha$  radiation ( $\lambda = 1.5418 \text{ \AA}$ ) employing a scanning rate of  $0.00267 \text{ }^\circ/\text{s}$  in the  $2\theta$  range of  $5^\circ$  to  $40^\circ$  and the samples were kept at room temperature during data collection. Single crystals of **2** and **3** were selected for single crystal X-ray diffraction analysis on a Rigaku RAXIS-RA PID diffractometer using graphite-monochromated  $\text{MoK}\alpha$  radiation ( $\lambda = 0.71073 \text{ \AA}$ ), and the crystals were kept at room temperature during data collection. The structures were solved by the direct methods and refined on F2 by full-matrix least-square using the SHELXTL-97 program. Scanning electron microscopy (SEM) was performed on a HITACHI SU8020 (operating at 3 kV). The xerogels were placed on silica wafer and coated with gold for SEM measurements. Rheological measurements were performed on a TA instrument (AR2000 Rheometer) equipped with an aluminum plate of 8 mm diameter. The samples were sandwiched between the two plates with a gap of 1.0 mm throughout the experiments.

### Preparation of organogels and xerogel films

The preparation of organogels were according to the previous procedure.<sup>2,3</sup> The hot solutions of **2** or **3** in acetone/water (v/v = 1/1) were sonicated first for several seconds and then cooled naturally until organogels were formed. After the acetone/water organogels of **2** and **3** were dispersed into *n*-hexane, the well-dispersed nanofibers were produced. The xerogel films were prepared after casting the nanofibers onto the substrates, followed by the evaporation of the solvent naturally.

### **Preparation of the free-standing organogels (FSOG) and free-standing hydrogels (FSHG)**

The hot acetone/water (v/v = 1/1) solutions of **2** (12 mg) and ink (1  $\mu$ L) were sonicated first for several seconds and then cooled naturally until the organogels formed. The formed organogels were removed from the test tube or cuvette to give the free-standing organogels, which could be immersed in water for hours to give FSHG.

### **Sensory properties investigation**

The sensory properties for the xerogel films were carried out at 25 °C. Firstly, the acid vapors at a certain concentration were obtained by diluting the saturated vapors with nitrogen, and then were injected into a quartz cell (10 mm in width) containing the film. The changes in the emission were recorded after the injection of acid vapor for 10 s.

### **UV irradiation of self-standing organogel**

The upper part of the free-standing organogel was threaded with a needle, which was fixed with brackets, and was irradiated by LED lamp (365 nm, 16.7 mW/cm<sup>2</sup>). The process was recorded by Mi 10S.

## **Synthesis**

### **(Z)-2-phenyl-3-(quinolin-4-yl)acrylonitrile (**1**)**

Sodium hydroxide (0.06 g, 1.53 mmol) was dissolved in ethanol (30 mL) in a 100 mL round bottom flask. Quinoline-4-carbaldehyde (0.2 g, 1.27 mmol) was added subsequently. After that, 2-phenylacetonitrile (0.18 g, 1.53 mmol) in ethanol (10 mL) was added dropwise. After stirred at room temperature overnight, the crude product was collected via filtration over a Buchner funnel. And then, the filter cake was added

in dichloromethane under stirring. The precipitation was removed by filtration. Subsequently, petroleum ether (6 times of  $V_{\text{DCM}}$ ) was added gradually into the saturated dichloromethane solution, and the yellow solid was collected (0.16 g, yield is 48%). Mp: 114.0-116.0 °C;  $^1\text{H}$  NMR (400 MHz,  $\text{DMSO-}d_6$ )  $\delta$  9.07 (d,  $J = 4.4$  Hz, 1H), 8.78 (s, 1H), 8.25 (d,  $J = 8.4$  Hz, 1H), 8.14 (d,  $J = 8.4$  Hz, 1H), 7.96 – 7.86 (m, 4H), 7.73 (t,  $J = 7.6$  Hz, 1H), 7.62-7.53 (m, 3H) (Figure S32);  $^{13}\text{C}$  NMR (101 MHz,  $\text{CDCl}_3$ )  $\delta$  150.30, 148.38, 139.21, 137.03, 133.26, 130.51, 130.36, 130.00, 129.37, 127.53, 126.45, 126.09, 123.25, 120.16, 118.70, 116.69 (Figure S33); FT-IR (KBr,  $\text{cm}^{-1}$ ): 3423.4, 3060.0, 3028.8, 3002.7, 2220.1, 1615.2, 1582.1, 1562.3, 1505.3, 1450.9, 1387.6, 1361.4, 1342.9, 1267.1, 1250.9, 1161.3, 1143.5, 1081.3, 1000.6, 955.6, 895.7, 867.8, 848.1, 813.4, 765.7, 747.4, 687.8, 594.5, 527.9, 483.3, 465.8, 435.7; HPLC-MS: Calcd. For  $\text{C}_{18}\text{H}_{12}\text{N}_2$  257.1080, found: 257.1068  $[\text{M}+\text{H}]^+$  (Figure S34).

*(Z)*-2-(4-fluorophenyl)-3-(quinolin-4-yl)acrylonitrile (**2**)

Compound **2** was prepared according to a similar synthetic method as that for compound **1** from quinoline-4-carbaldehyde (0.2 g, 1.27 mmol), 2-(4-fluorophenyl)acetonitrile (0.21 g, 1.53 mmol) and sodium hydroxide (0.06 g, 1.53 mmol). After stirred at room temperature for 6 h, the reaction mixture was poured into water (200 mL). The crude product was collected via filtration over a Buchner funnel. And then, the filter cake was added in dichloromethane under stirring. The precipitation was removed by filtration. Subsequently, petroleum ether (5 times of  $V_{\text{DCM}}$ ) was added gradually into the saturated dichloromethane solution, and the yellow solid was collected (0.17 g, yield is 52%). Mp: 118.0-120.0 °C;  $^1\text{H}$  NMR (400 MHz,  $\text{DMSO-}d_6$ )  $\delta$  9.07 (d,  $J = 4.8$  Hz, 1H), 8.76 (s, 1H), 8.25 (d,  $J = 8.4$  Hz, 1H), 8.14 (d,  $J = 8.4$  Hz, 1H), 8.01 (dd,  $J = 8.8, 5.2$  Hz, 2H), 7.92 – 7.86 (m, 2H), 7.72 (t,  $J = 7.2$  Hz, 1H), 7.45 (t,  $J = 8.8$  Hz, 2H) (Figure S35);  $^{13}\text{C}$  NMR (101 MHz,  $\text{CDCl}_3$ )  $\delta$  163.86 (d,  $J = 253.1$  Hz), 150.30, 148.40, 139.01, 136.90, 130.56, 130.04, 129.47 (d,  $J = 3.3$  Hz), 128.44 (d,  $J = 8.6$  Hz), 127.57, 126.02, 123.17, 120.12, 117.57, 116.56, 116.54 (d,  $J = 22.2$  Hz) (Figure S36); FT-IR (KBr,  $\text{cm}^{-1}$ ): 3048.5, 2216.6, 1603.2, 1582.2, 1564.8, 1511.9, 1463.6, 1424.6, 1389.7, 1360.1, 1307.4, 1258.1, 1253.8, 1235.8, 1212.6, 1165.1, 1151.4, 1013.9, 903.2, 874.6, 841.7, 793.9, 776.1, 754.5, 619.8, 571.9, 505.5, 457.5,

442.4; HPLC-MS: Calcd. For  $C_{18}H_{11}FN_2$  275.0906, found: 275.0973  $[M+H]^+$  (Figure S37).

(*Z*)-3-(quinolin-4-yl)-2-(4-(trifluoromethyl)phenyl)acrylonitrile (**3**)

Compound **3** was prepared according to a similar synthetic method as that for compound **1** from quinoline-4-carbaldehyde (0.2 g, 1.27 mmol), 2-(4-(trifluoromethyl)phenyl)acetonitrile (0.28 g, 1.53 mmol) and sodium hydroxide (0.06 g, 1.53 mmol). After stirred at room temperature for 8 h, the crude product was collected via filtration over a Buchner funnel. The purification of compound **3** was same as that for compound **1**. The yellow solid (0.17 g, yield is 42%) was gained. Mp: 128.0-131.0 °C;  $^1H$  NMR (400 MHz, DMSO- $d_6$ )  $\delta$  9.09 (d,  $J = 4.4$  Hz, 1H), 8.95 (s, 1H), 8.27 (d,  $J = 8.4$  Hz, 1H), 8.16 (t,  $J = 7.6$  Hz, 3H), 7.98 – 7.95 (m, 3H), 7.89 (t,  $J = 8.0$  Hz, 1H), 7.73 (t,  $J = 8.0$  Hz, 1H) (Figure S38);  $^{13}C$  NMR (101 MHz,  $CDCl_3$ )  $\delta$  150.26, 148.41, 139.29, 138.58, 136.60, 132.35 (t,  $J = 33.5$  Hz), 130.41 (d,  $J = 45.7$  Hz), 127.77, 126.85, 126.40 (d,  $J = 3.7$  Hz), 125.86, 124.99, 123.05, 122.28, 120.16, 117.42, 116.17 (Figure S39); FT-IR (KBr,  $cm^{-1}$ ): 3072.5, 3054.7, 3011.8, 2216.4, 1616.3, 1580.7, 1563.3, 1504.3, 1461.6, 1415.0, 1389.8, 1323.4, 1242.5, 1178.5, 1141.8, 1118.4, 1069.0, 1016.1, 988.8, 968.6, 915.9, 871.5, 846.1, 836.3, 794.1, 776.0, 758.5, 731.2, 677.9, 602.2, 517.3, 494.8, 454.3, 431.2; HPLC-MS: Calcd. For  $C_{19}H_{11}F_3N_2$  325.0954, found: 325.0932  $[M+H]^+$  (Figure S40).

**Table S1.** Main electronic transitions calculated with TD-DFT.

| Compound | $\lambda_{\text{abs}}^{[\text{a}]}$ (nm) | $\lambda_{\text{abs}}^{[\text{b}]}$ (nm) | f <sup>[c]</sup> | Main Transition <sup>[d]</sup> |
|----------|------------------------------------------|------------------------------------------|------------------|--------------------------------|
| <b>1</b> | 214                                      | 221.45                                   | 0.0388           | H→L+4                          |
|          | 257                                      | 254.73                                   | 0.0147           | H-2→L+1                        |
|          | 325                                      | 310.10                                   | 0.1719           | H-1→L                          |
| <b>2</b> | 216                                      | 213.73                                   | 0.0773           | H→L+4                          |
|          | 260                                      | 252.05                                   | 0.1064           | H-5→L                          |
|          | 323                                      | 335.85                                   | 0.2059           | H-2→L                          |
| <b>3</b> | 216                                      | 224.15                                   | 0.2111           | H→L+3                          |
|          | 263                                      | 267.25                                   | 0.0182           | H→L+1                          |
|          | 328                                      | 329.78                                   | 0.3488           | H-2→L                          |

<sup>a</sup> Experimental absorption in cyclohexane; <sup>b</sup> Calculated absorption in cyclohexane;

<sup>c</sup> Oscillator strength; <sup>d</sup> H represents HOMO, L represents LUMO.

**Table S2.** Gelation abilities of **1**, **2** and **3** in selected organic solvents.

| Solvent                       | <b>1</b> (CGC)        | <b>2</b> (CGC)        | <b>3</b> |
|-------------------------------|-----------------------|-----------------------|----------|
| Petroleum ether               | P                     | I                     | I        |
| Ethanol                       | G (2.53)              | S                     | S        |
| Ethyl acetate                 | S                     | S                     | S        |
| <i>i</i> -Propanol            | G (2.55)              | P                     | P        |
| 1,2-Dichloroethane            | S                     | S                     | S        |
| Toluene                       | S                     | S                     | S        |
| 1,4-Dioxane                   | S                     | S                     | S        |
| Acetonitrile                  | G (2.54)              | S                     | S        |
| Acetone                       | S                     | S                     | S        |
| Acetonitrile/H <sub>2</sub> O | G (0.75, v/v = 1/1)   | G (0.53, v/v = 1/3)   | S        |
| Acetone/H <sub>2</sub> O      | G (0.38, v/v = 1.4/1) | G (0.11, v/v = 1/1.3) | P        |

G: gel, S: solution, P: precipitate, I: insoluble, CGC: critical gelation concentration (wt%)

**Table S3.** Single crystal data and structure refinement for **2**, **3**, **4** and **5**.

|                            | <b>2</b>                                            | <b>3</b>                                                      | <b>4</b>                                            | <b>5</b>                                            |
|----------------------------|-----------------------------------------------------|---------------------------------------------------------------|-----------------------------------------------------|-----------------------------------------------------|
| Formula                    | C <sub>18</sub> H <sub>11</sub> FN <sub>2</sub>     | C <sub>19</sub> H <sub>11</sub> F <sub>3</sub> N <sub>2</sub> | C <sub>18</sub> H <sub>9</sub> FN <sub>2</sub>      | C <sub>18</sub> H <sub>10</sub> N <sub>2</sub>      |
| Formula weight             | 274.29                                              | 324.30                                                        | 272.27                                              | 254.28                                              |
| Space group                | <i>P2<sub>1</sub>/c</i>                             | <i>P-1</i>                                                    | <i>P-1</i>                                          | <i>C2/c</i>                                         |
| Crystal system             | monoclinic                                          | triclinic                                                     | triclinic                                           | monoclinic                                          |
| a/Å                        | 7.2368(6)                                           | 6.9801(7)                                                     | 3.7431(7)                                           | 29.4976(15)                                         |
| b/Å                        | 5.0575(4)                                           | 9.2324(9)                                                     | 12.294(3)                                           | 4.2990(2)                                           |
| c/Å                        | 36.437(3)                                           | 12.0514(13)                                                   | 14.717(3)                                           | 19.9989(10)                                         |
| α/deg                      | 90                                                  | 84.242(4)                                                     | 88.588(12)                                          | 90                                                  |
| β/deg                      | 95.354(3)                                           | 86.465(4)                                                     | 88.971(8)                                           | 104.202(2)                                          |
| γ/deg                      | 90                                                  | 76.598(4)                                                     | 87.456(7)                                           | 90                                                  |
| Volume/ Å <sup>3</sup>     | 1327.78(19)                                         | 751.08(13)                                                    | 676.3(2)                                            | 2458.6(2)                                           |
| Z                          | 4                                                   | 2                                                             | 2                                                   | 8                                                   |
| D(calc)/g cm <sup>-3</sup> | 1.372                                               | 1.434                                                         | 1.337                                               | 1.374                                               |
| μ/mm <sup>-1</sup>         | 0.092                                               | 0.112                                                         | 0.090                                               | 0.082                                               |
| Final R indexes            | R <sub>1</sub> = 0.1067                             | R <sub>1</sub> = 0.0466                                       | R <sub>1</sub> = 0.0462                             | R <sub>1</sub> = 0.0433                             |
| [I>2σ(I)]                  | wR <sub>2</sub> = 0.2113                            | wR <sub>2</sub> = 0.1152                                      | wR <sub>2</sub> = 0.1282                            | wR <sub>2</sub> = 0.1147                            |
| R indexes (all data)       | R <sub>1</sub> = 0.1237<br>wR <sub>2</sub> = 0.2173 | R <sub>1</sub> = 0.0569<br>wR <sub>2</sub> = 0.1218           | R <sub>1</sub> = 0.0689<br>wR <sub>2</sub> = 0.1431 | R <sub>1</sub> = 0.0638<br>wR <sub>2</sub> = 0.1320 |
| GoF                        | 1.253                                               | 1.053                                                         | 1.046                                               | 1.055                                               |
| CCDC                       | 2214985                                             | 2214984                                                       | 2214983                                             | 2214982                                             |



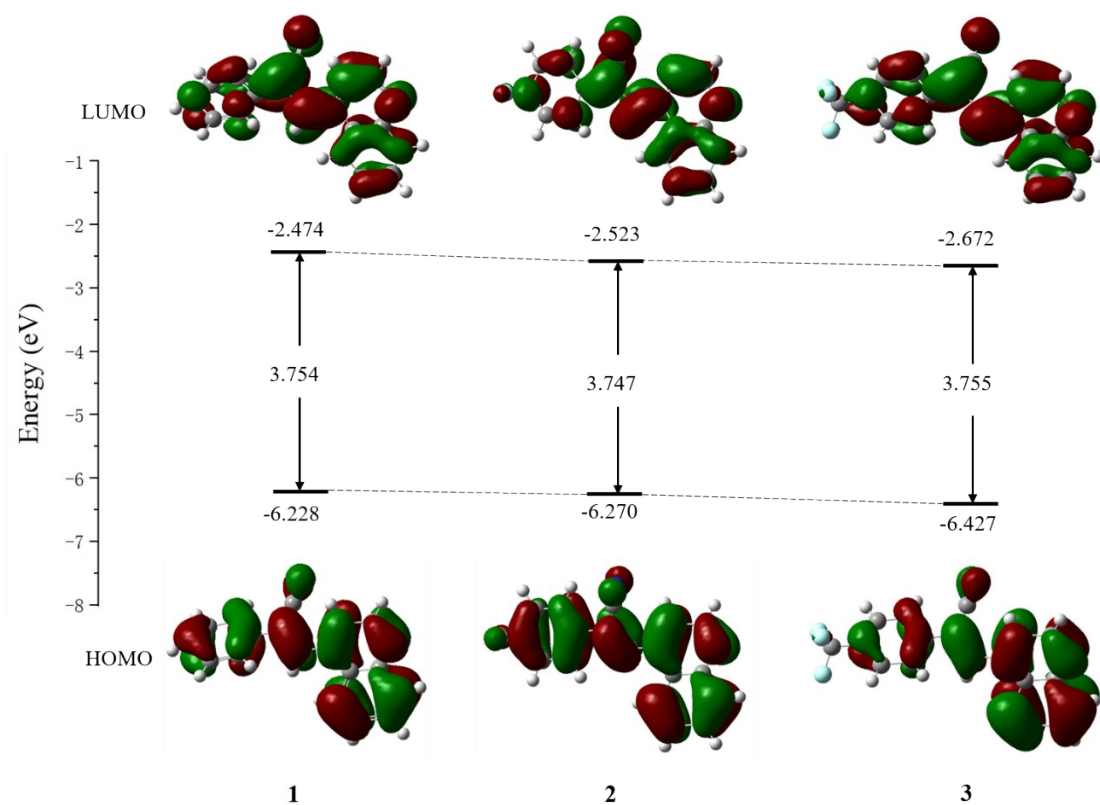

**Figure S1.** The frontier molecular orbital plots and energy levels for the HOMOs and LUMOs of **1**, **2** and **3**.

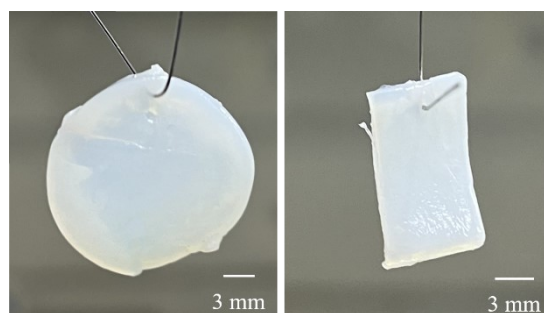

**Figure S2.** Photos of free-standing organogel (FSOG, 0.56 wt%) based on **2** with different shape obtained from the different mold.

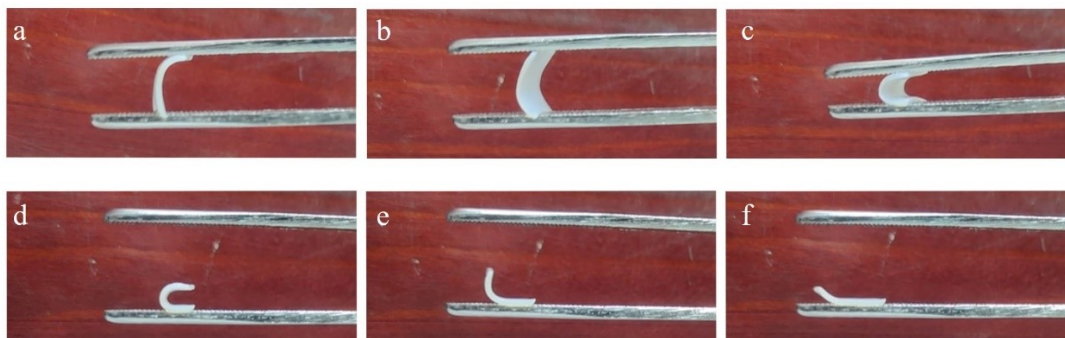

**Figure S3.** Photos in the process of the mechanical deformation of the FSOG (0.74 wt%,  $v_{\text{acetone}}/v_{\text{water}} = 1/1$ ) based on **2** under external mechanical force.

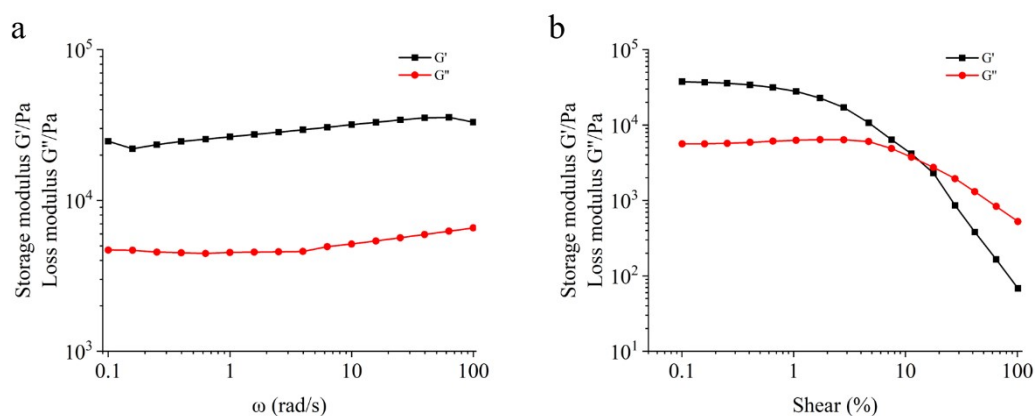

**Figure S4.** (a) Frequency dependence of storage modulus ( $G'$ ) and loss modulus ( $G''$ ) of FSOG based on **2** (0.74 wt%,  $v_{\text{acetone}}/v_{\text{water}} = 1/1$ , strain: 0.1%); (b) Shear dependence of  $G'$  and  $G''$  of FSOG based on **2** (0.74 wt%,  $v_{\text{acetone}}/v_{\text{water}} = 1/1$ , angular frequency at 5 rad/s).

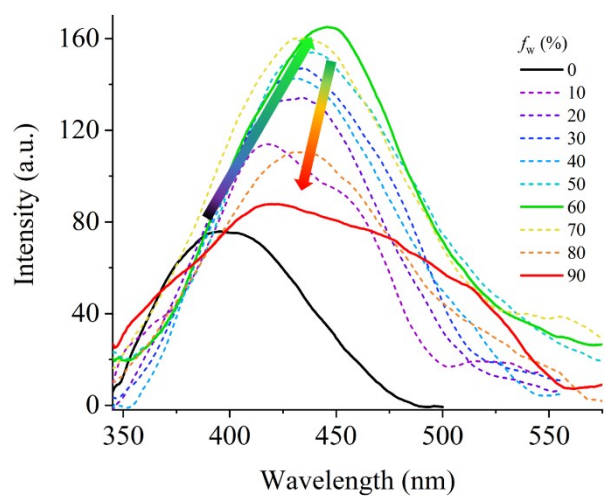

**Figure S5.** Fluorescence emission spectra of **2** in THF/H<sub>2</sub>O mixtures with different  $f_w$ .

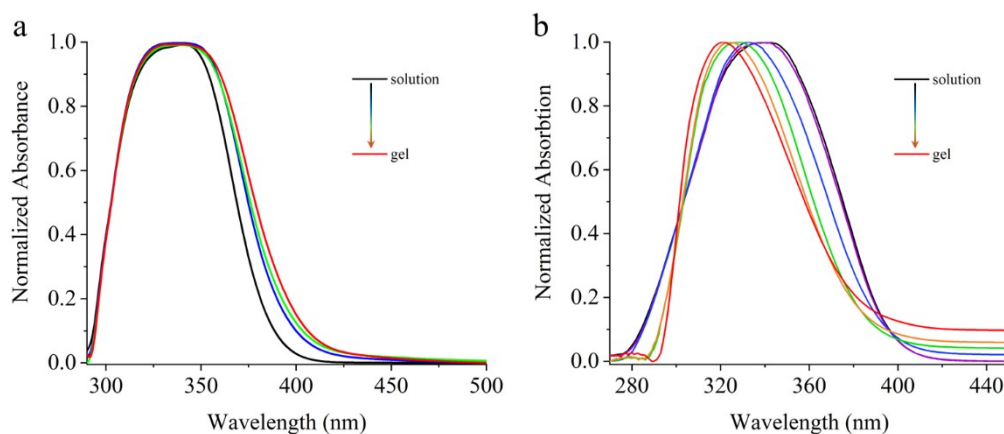

**Figure S6.** Time-dependent UV-vis absorption spectra for **2** (a) and **1** (b) in acetone/H<sub>2</sub>O (v/v=1/1, 5 mg mL<sup>-1</sup> for both) upon aging the pre-sonicated hot solutions to room temperature.

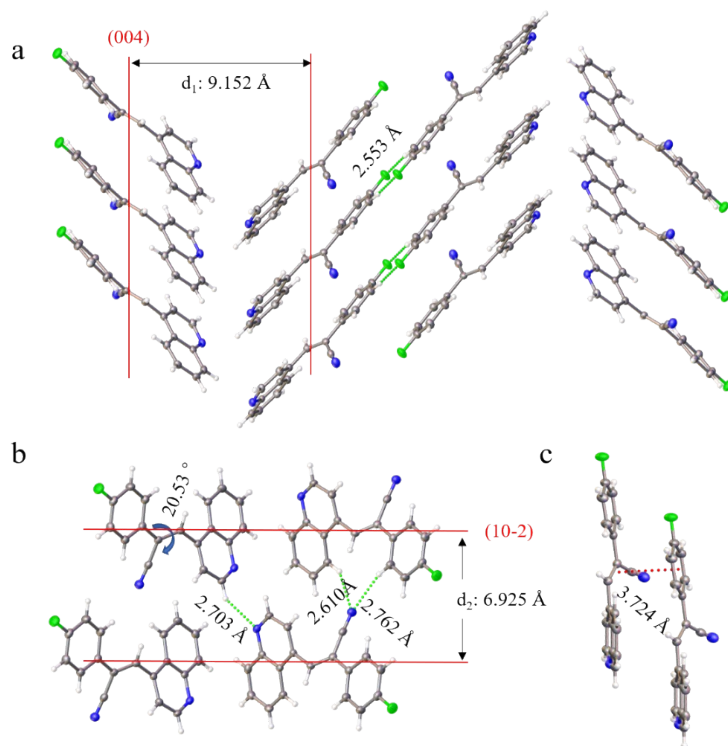

**Figure S7.** (a) The single crystal structure of **2** viewed along the a-axis and the distance of C–H···F interactions between two adjacent molecules; (b) the dihedral angle between the plane of the phenyl and quinolyl ring and the distance of C–H···N interactions; (c) the distance of p– $\pi$  conjugate. The red lines refer to the Miller planes.

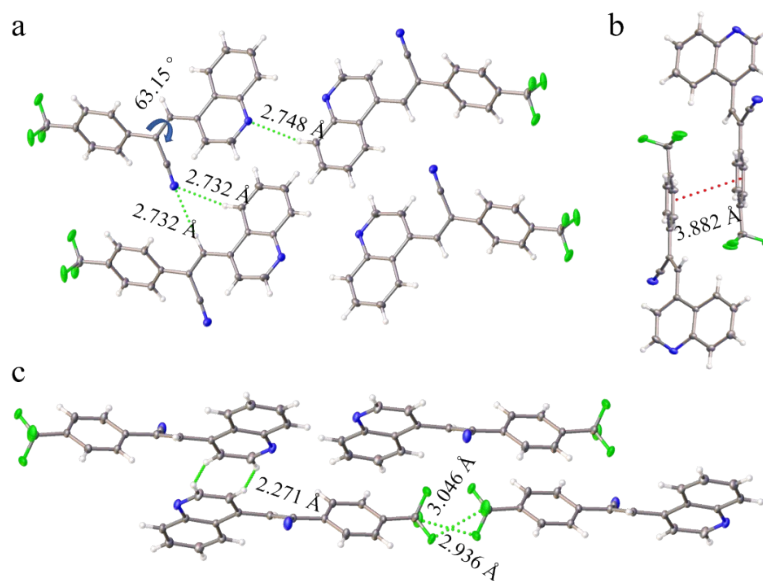

**Figure S8.** (a) The dihedral angle between the plane of the phenyl and quinolyl ring and the distance of C–H···N interactions in the single crystal of **3**; (b) the distance between two adjacent parallel benzene rings; (c) the single crystal structure viewed along the a-axis and the distance of the H···H interactions as well as the F···F interactions.

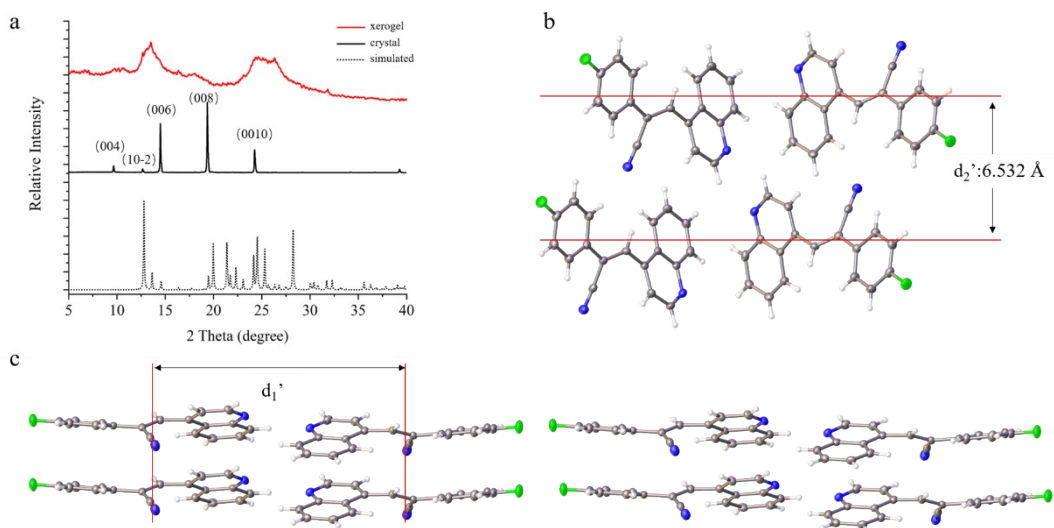

**Figure S9.** (a) PXRD patterns of **2** in xerogels and crystals, as well as the simulated PXRD pattern from single crystal structure of **2** (b,c). The possible crystal packing of **2** in xerogels. The diffraction peaks of microcrystals of **2** (black) at  $9.69^\circ$ ,  $14.52^\circ$ ,  $19.45^\circ$  and  $24.29^\circ$  are attributed to (004), (006), (008) and (0010) Miller planes, respectively. These miller planes are parallel to the dominant faces of crystal with d value of  $9.152 \text{ \AA}$  ( $d_1$  in Figure S7). The diffraction peak at  $12.68^\circ$  is corresponding to (10-2) Miller plane with d value of  $6.925 \text{ \AA}$  ( $d_2$  in Figure S7).

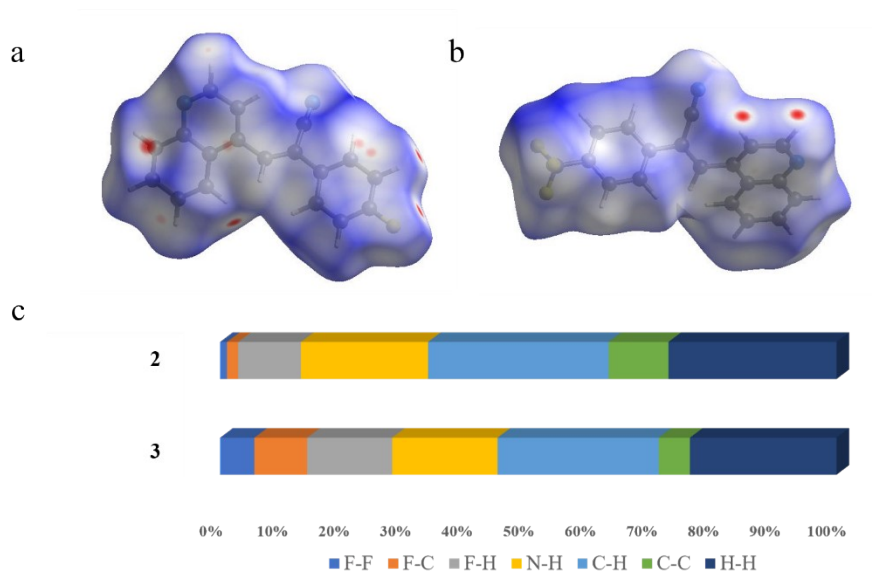

**Figure S10.** The Hirshfeld surface of an individual molecule in crystals of **2** (a) and **3** (b), relative contributions of various contacts to the Hirshfeld surface of **2** and **3** (c).

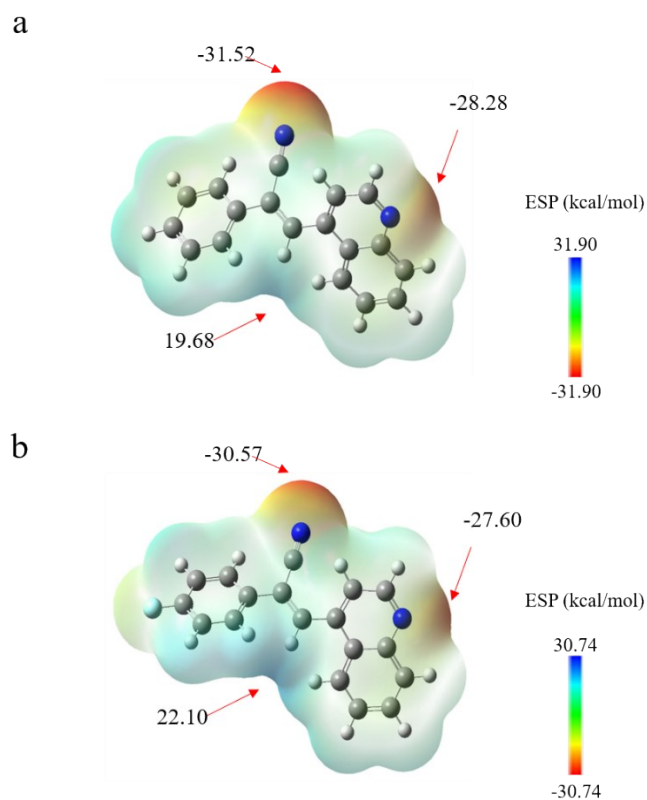

**Figure S11.** 3D representation of the electrostatic potentials isosurface of **1** (a) and **2** (b) mapped onto its total density surface, determined using DFT at the B3LYP/6-31G(d) level. The units are in kcal/mol.

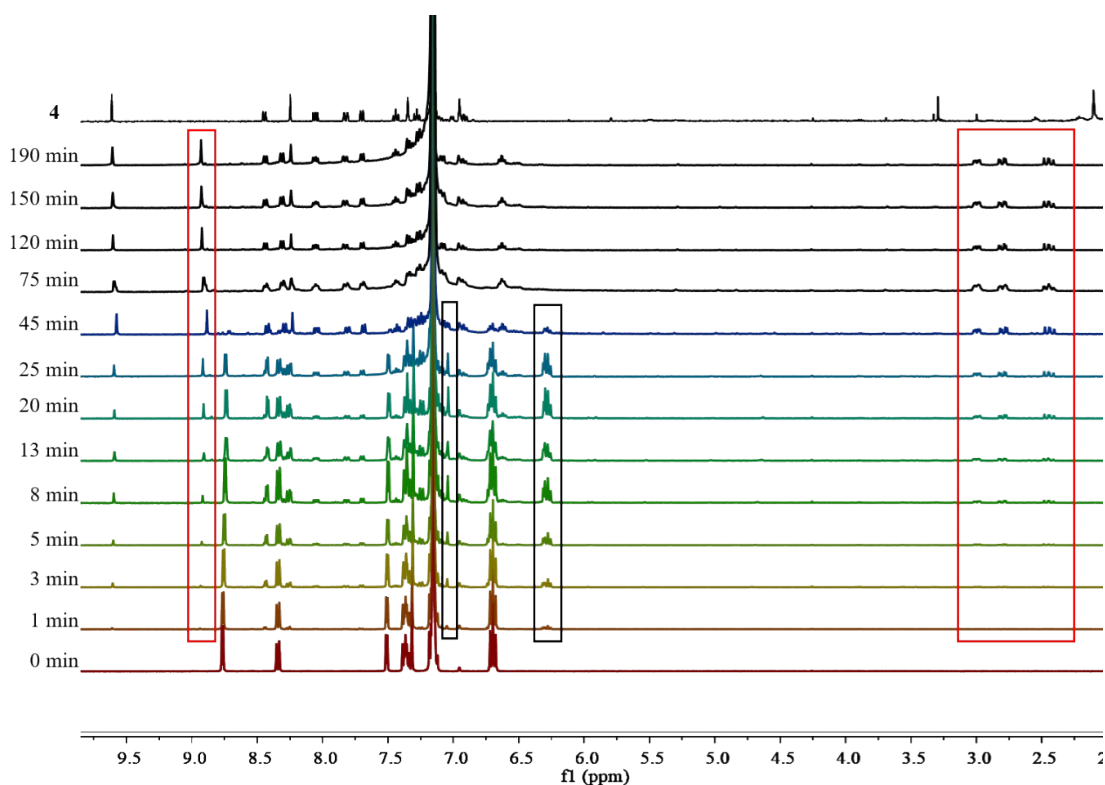

**Figure S12.**  $^1\text{H}$  NMR spectra of **2** before and after irradiation by 365 nm light ( $16.7 \text{ mW/cm}^2$ ) for different times in benzene- $d_6$ ; and  $^1\text{H}$  NMR spectra of **4**. The red and black boxes show the newly emerged signals during photoreaction.

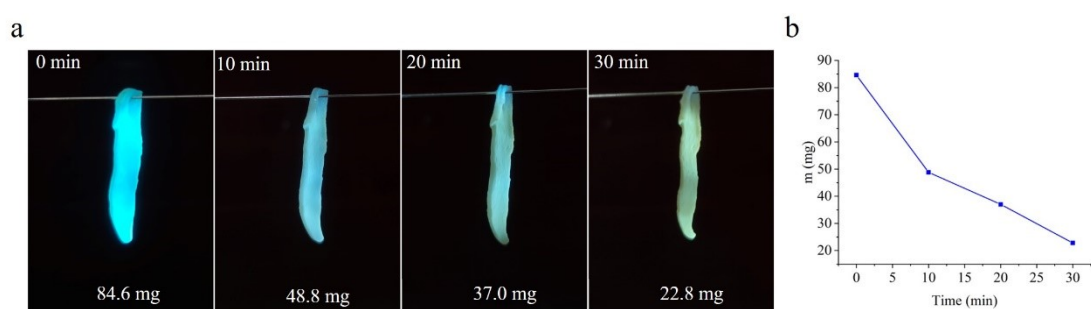

**Figure S13.** (a) Photos of FSOG of **2** ( $0.74 \text{ wt}\%$ ,  $v_{\text{acetone}}/v_{\text{water}} = 1/1$ ) exposing to 365 nm light ( $16.7 \text{ mW/cm}^2$ ) for different times; (b) The mass of FSOG of **2** after irradiation with 365 nm light ( $16.7 \text{ mW/cm}^2$ ) for different times.



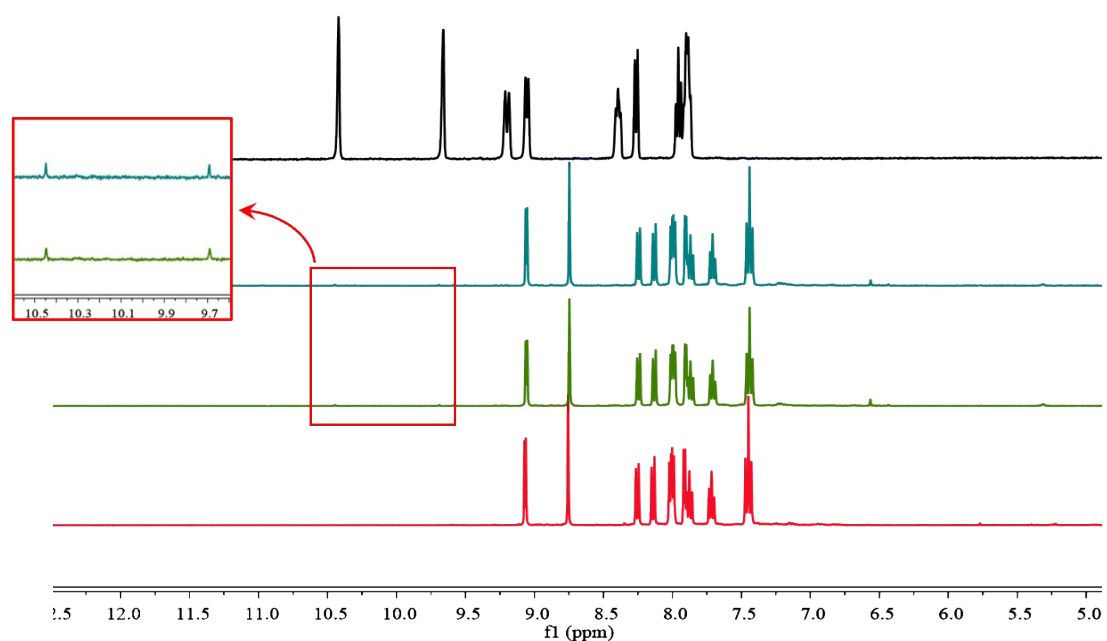

**Figure S14.**  $^1\text{H}$  NMR spectra of **2** before (red) and after irradiating its FSHG (FSOG: 0.74 wt%,  $v_{\text{acetone}}/v_{\text{water}} = 1/1$ , green) and FSOG (0.74 wt%,  $v_{\text{acetone}}/v_{\text{water}} = 1/1$ , blue) by 365 nm light ( $16.7 \text{ mW}/\text{cm}^2$ ) for 30 min, followed by dissolved in  $\text{DMSO}-d_6$ ; and  $^1\text{H}$  NMR spectra of **4** (black). The red and black boxes show the newly emerged signals during photoreaction.

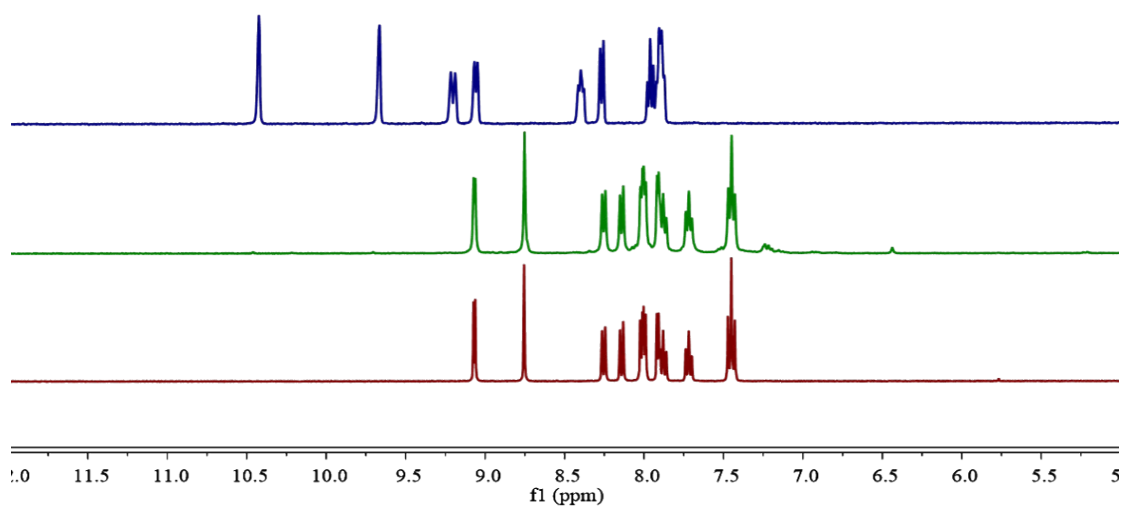

**Figure S15.**  $^1\text{H}$  NMR spectra of **2** before (red) and after (green) irradiation by 365 nm light ( $16.7 \text{ mW/cm}^2$ ) for 40 min in xerogel, followed by dissolved in  $\text{DMSO-}d_6$ ; and  $^1\text{H}$  NMR spectra of **4** (blue).

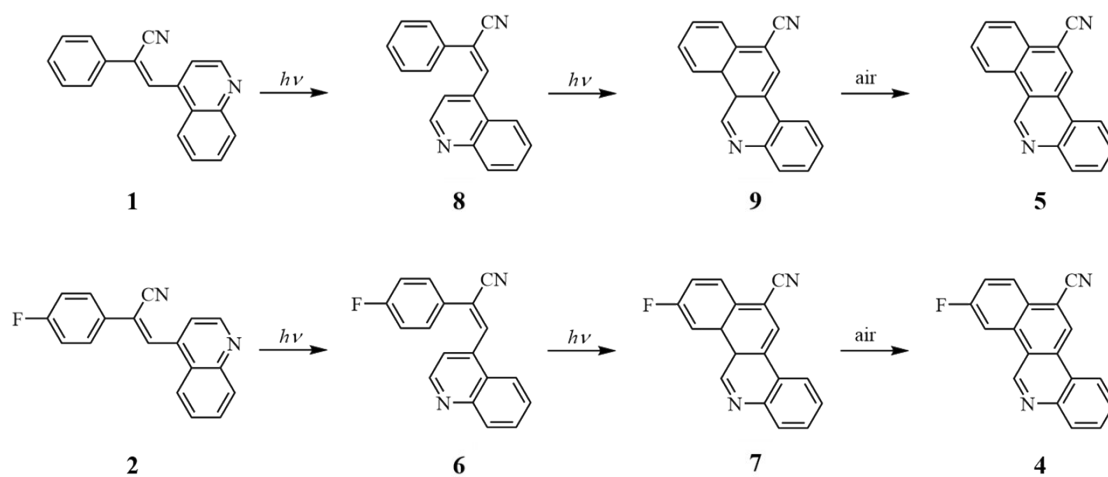

**Scheme S1.** The photo-induced transformation from **2** to **4**, and from **1** to **5**.<sup>1</sup>

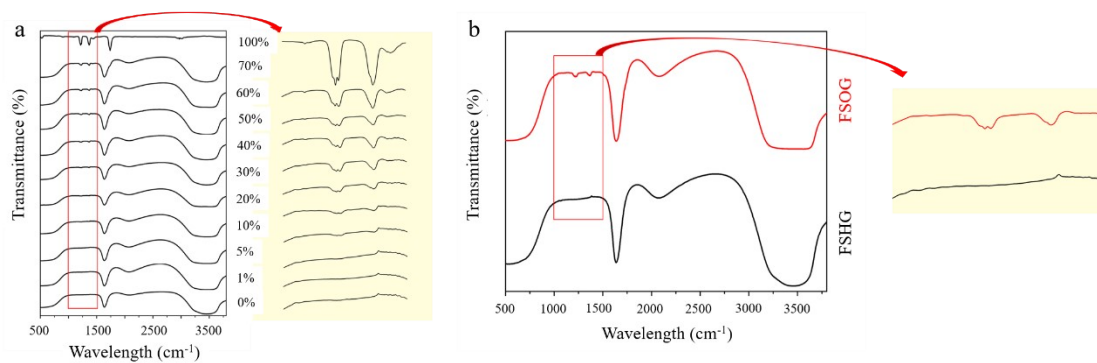

**Figure S16.** (a) the Fourier transform infrared spectra (FTIR) standard card of acetone/H<sub>2</sub>O with different fraction of acetone. (b) the FTIR of solvent in FSOG and FSHG.

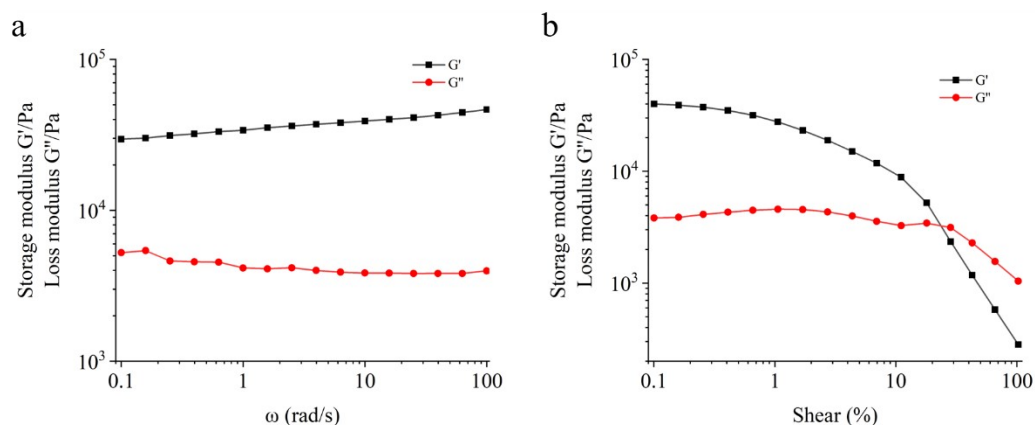

**Figure S17.** (a) Frequency dependence of storage modulus ( $G'$ ) and loss modulus ( $G''$ ) of FSHG based on **2** (FSOG: 0.74 wt%,  $v_{\text{acetone}}/v_{\text{water}} = 1/1$ , strain: 0.1%); (b) Shear dependence of  $G'$  and  $G''$  of FSHG based on **2** (FSOG: 0.74 wt%,  $v_{\text{acetone}}/v_{\text{water}} = 1/1$ , angular frequency at 5 rad/s).

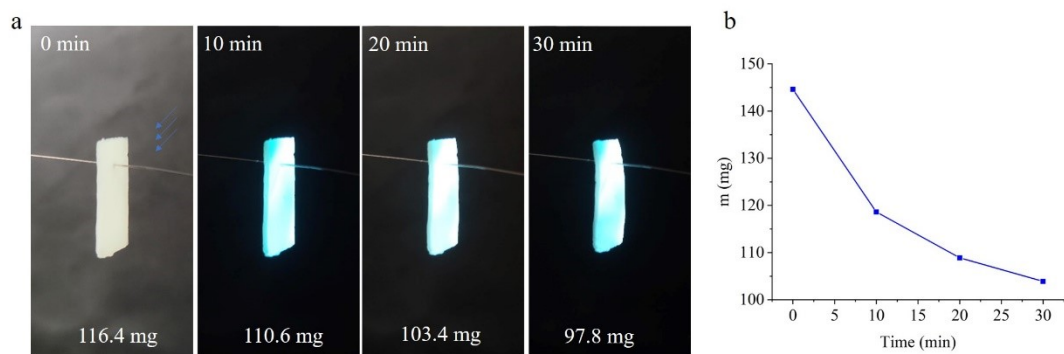

**Figure S18.** a) Photos of FSHG based on **2** (FSOG: 0.74 wt%,  $v_{\text{acetone}}/v_{\text{water}} = 1/1$ ) exposing to 365 nm light ( $16.7 \text{ mW/cm}^2$ ) for different times. b) The mass of FSHG based on **2** after irradiation with 365 nm light ( $16.7 \text{ mW/cm}^2$ ) for different times.

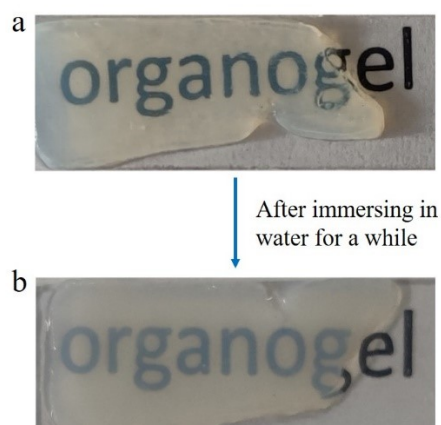

**Figure S19.** Photos of FSOG of **2** before (a) and after (b) water treatment.

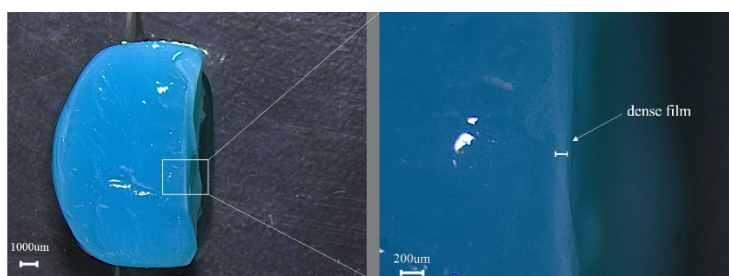

**Figure S20.** Microscopy photos of cross section of FSHG based on **2**.

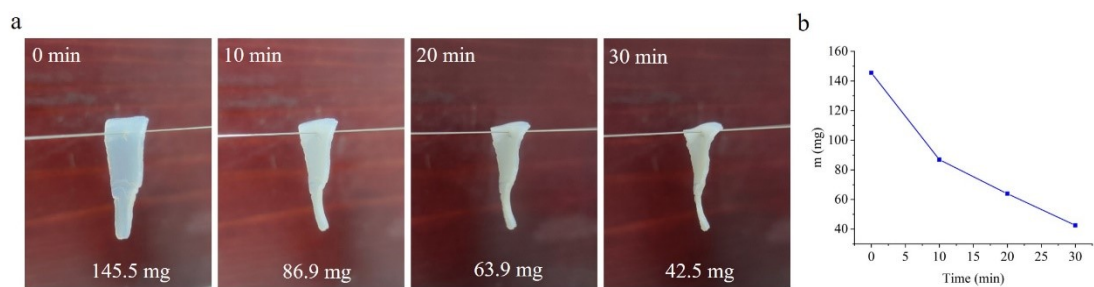

**Figure S21.** (a) Photos of FSOG based on **2** (0.74 wt%,  $v_{\text{acetone}}/v_{\text{water}} = 1/1$ ) exposing in air for different times. (b) The time-dependent mass of FSOG based on **2**.

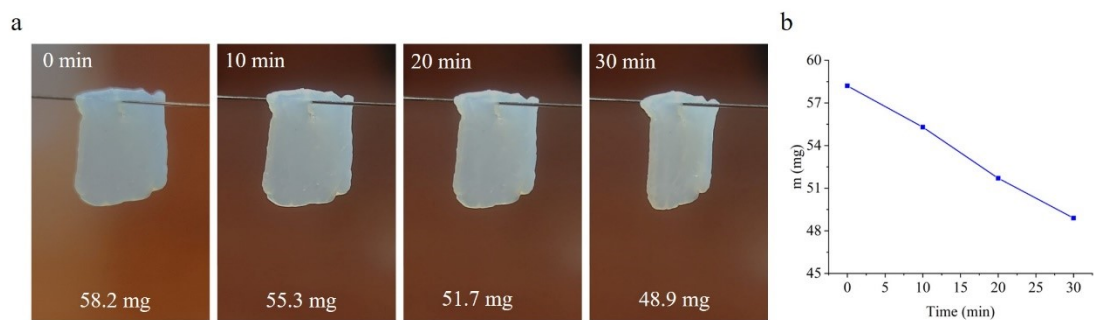

**Figure S22.** (a) Photos of FSHG based on **2** (FSOG: 0.74 wt%,  $v_{\text{acetone}}/v_{\text{water}} = 1/1$ ) exposing in air for different times; (b) The time-dependent mass of FSHG based on **2**.

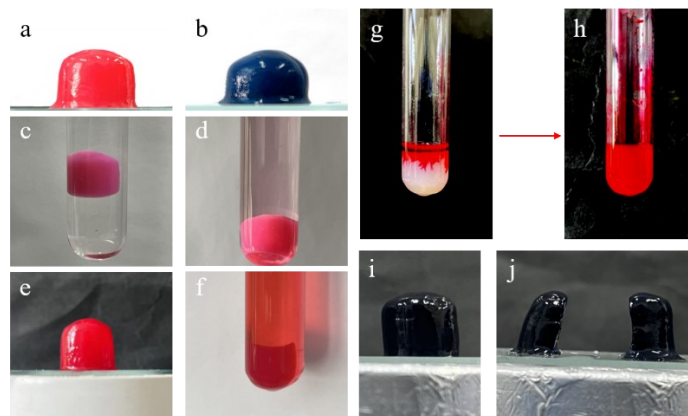

**Figure S23.** Photos of the FSOG based on **2** after adsorbing Eosin b (a) and Malachite green (b); photos of the FSHG based on **2** containing Eosin b before (c) and after immersing in water for a few days (d); photos of the newly obtained FSOG based on **2** containing Eosin b before (e) and after immersing in water for a few days (f); photos of FSOG based on **2** before (g) and after completely adsorbing Eosin b (h); photos of the FSOG based on **2** that adsorbed ink before (i) and after being cut into two pieces (j).

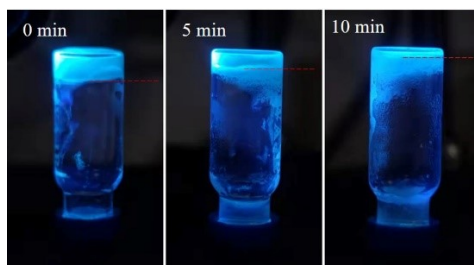

**Figure S24.** Photos of the organogel based on **1** collapse under irradiation by 365 nm light for different times.

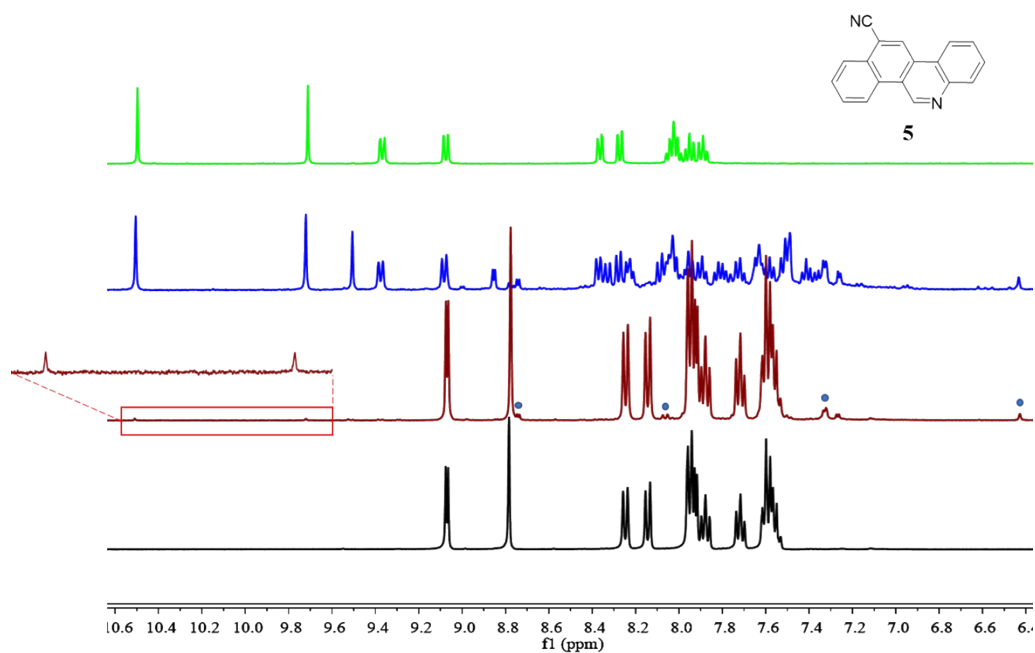

**Figure S25.**  $^1\text{H}$  NMR spectra of **1** before (black) and after irradiating xerogel (red) with 365 nm light ( $16.7 \text{ mW/cm}^2$ ) for 30 min, followed by dissolved in  $\text{DMSO-}d_6$ ; and irradiating organogel (blue) for 30 min, followed by dried and then dissolved in  $\text{DMSO-}d_6$ ; and the  $^1\text{H}$ -NMR spectrum of **5** (green). The blue pots and the red rhombic boxes show the newly emerged signals after isomerization and electrocyclization. Inset: the crystal structure of **5**.

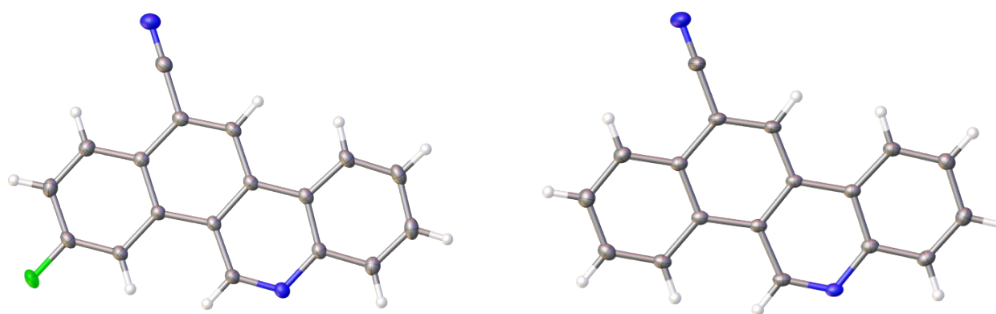

**Figure S26.** The single crystal structures of **4** (left) and **5** (right).

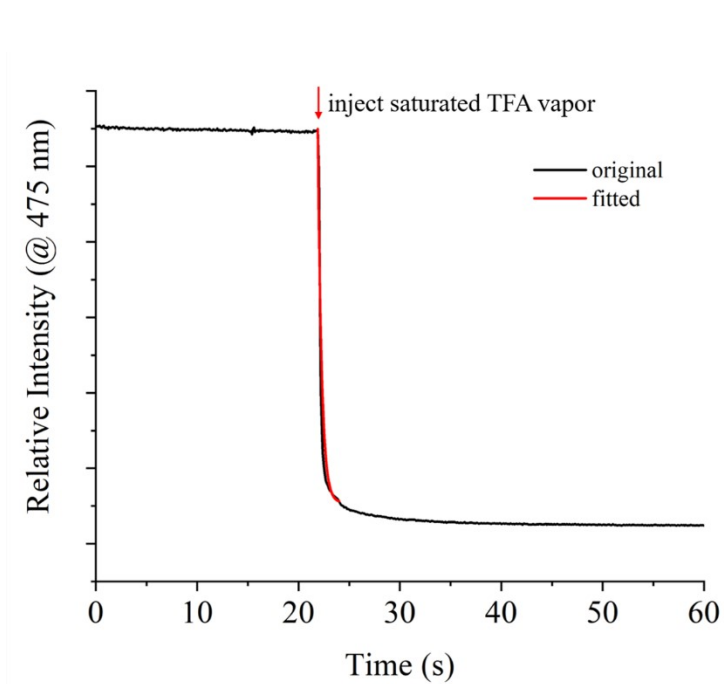

**Figure S27.** Time-course of fluorescence quenching ( $\lambda_{\text{ex}} = 350 \text{ nm}$ ) for the xerogel film of **2** upon exposure to saturated TFA vapor.

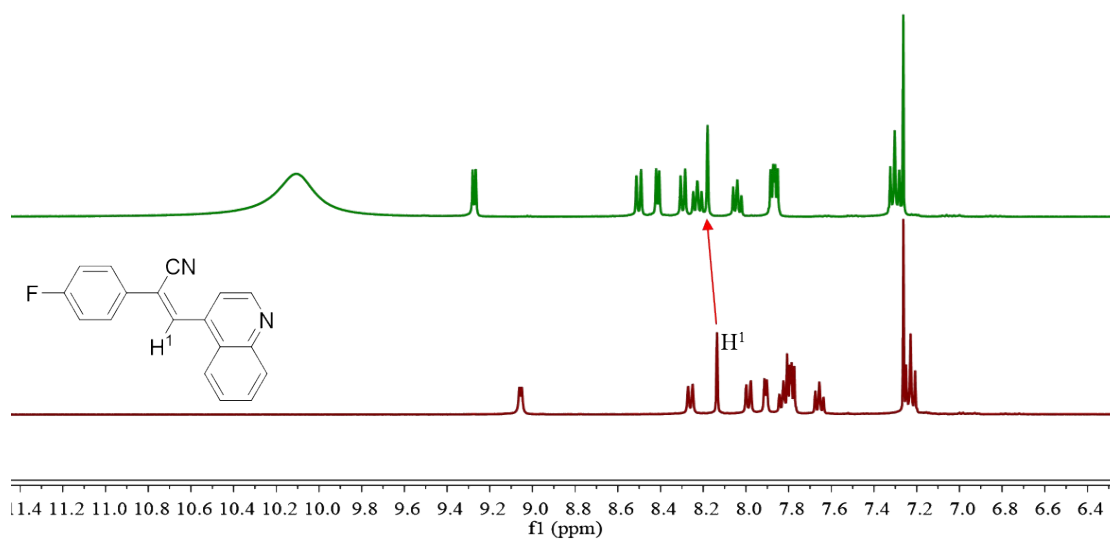

**Figure S28.**  $^1\text{H}$  NMR spectra of **2** before (red line) and after adding 10 equiv. (green line) of TFA in  $\text{CDCl}_3$ .



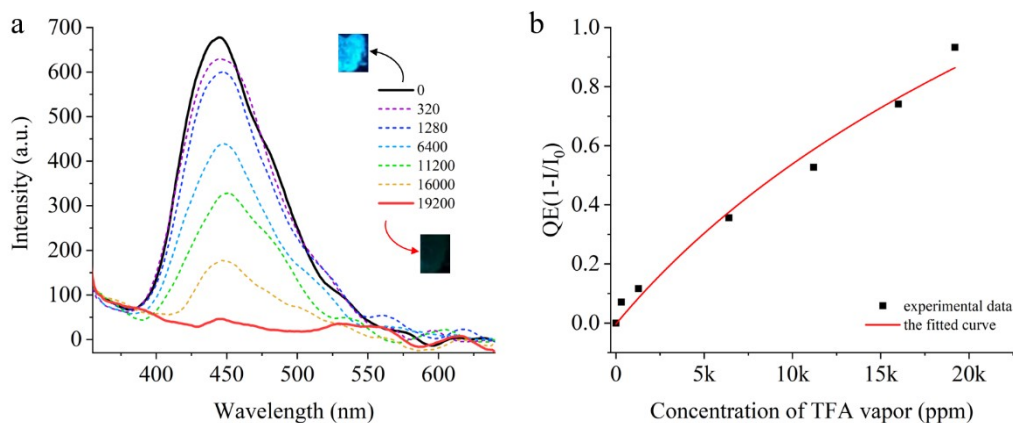

**Figure S29.** (a) Fluorescence emission spectra of **1** in xerogel film upon exposed to different amount of TFA vapor (0-19200 ppm) ( $\lambda_{\text{ex}} = 350$  nm). Inset: the photos of xerogel film of **1** before and after fuming with TFA vapor (19200 ppm). (b) Concentration-dependent fluorescence quenching efficiency at 447 nm for **1** in xerogel-based film upon exposed to TFA vapor.

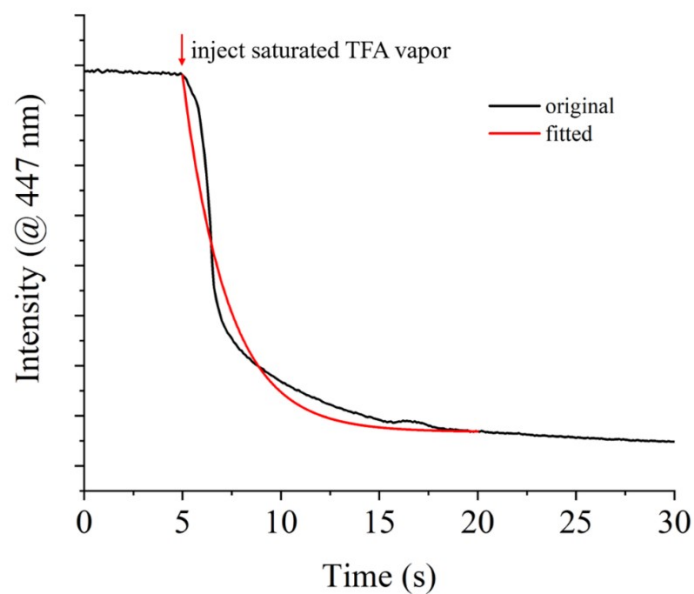

**Figure S30.** Time-course of fluorescence quenching ( $\lambda_{\text{ex}} = 350$  nm) of the **1** xerogel film upon exposure to saturated TFA vapor.

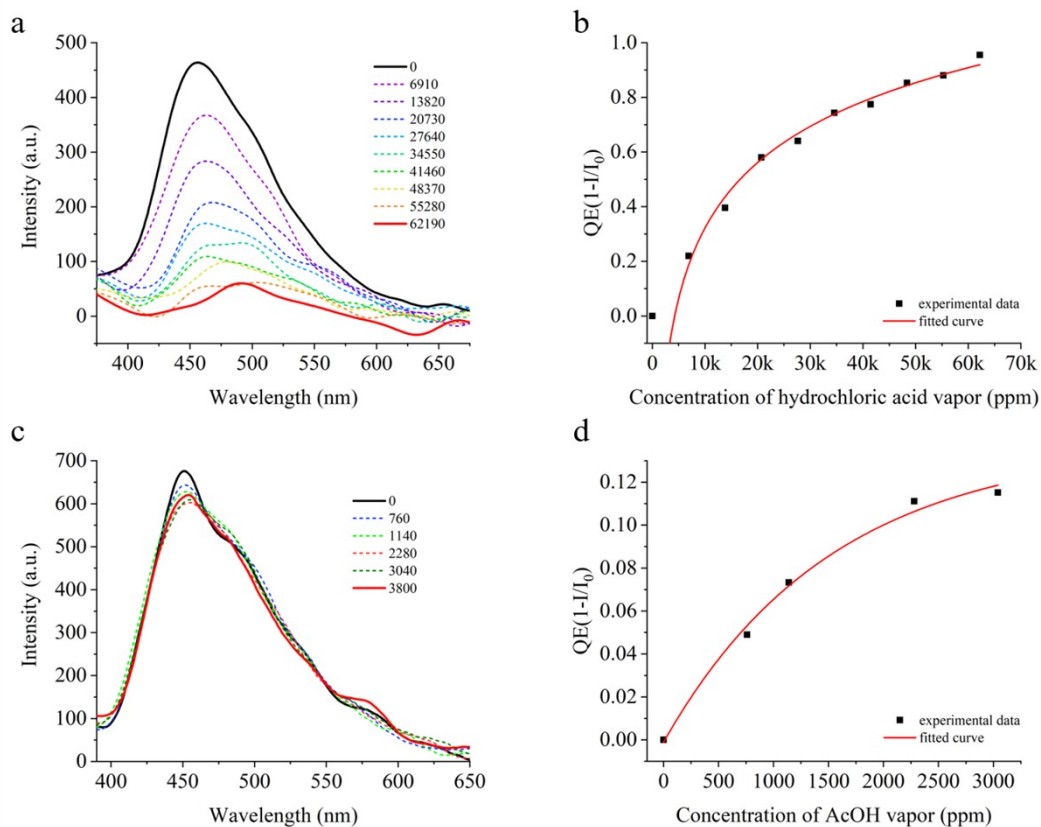

**Figure S31.** Fluorescence emission spectra of **2** in xerogel film upon exposed to different amount of hydrochloric acid (a) and acetic acid vapor (c,  $\lambda_{ex} = 350$  nm). Concentration-dependent fluorescence quenching efficiency at 475 nm for **2** in xerogel-based film upon exposed to hydrochloric acid (b) and acetic acid vapor (d).

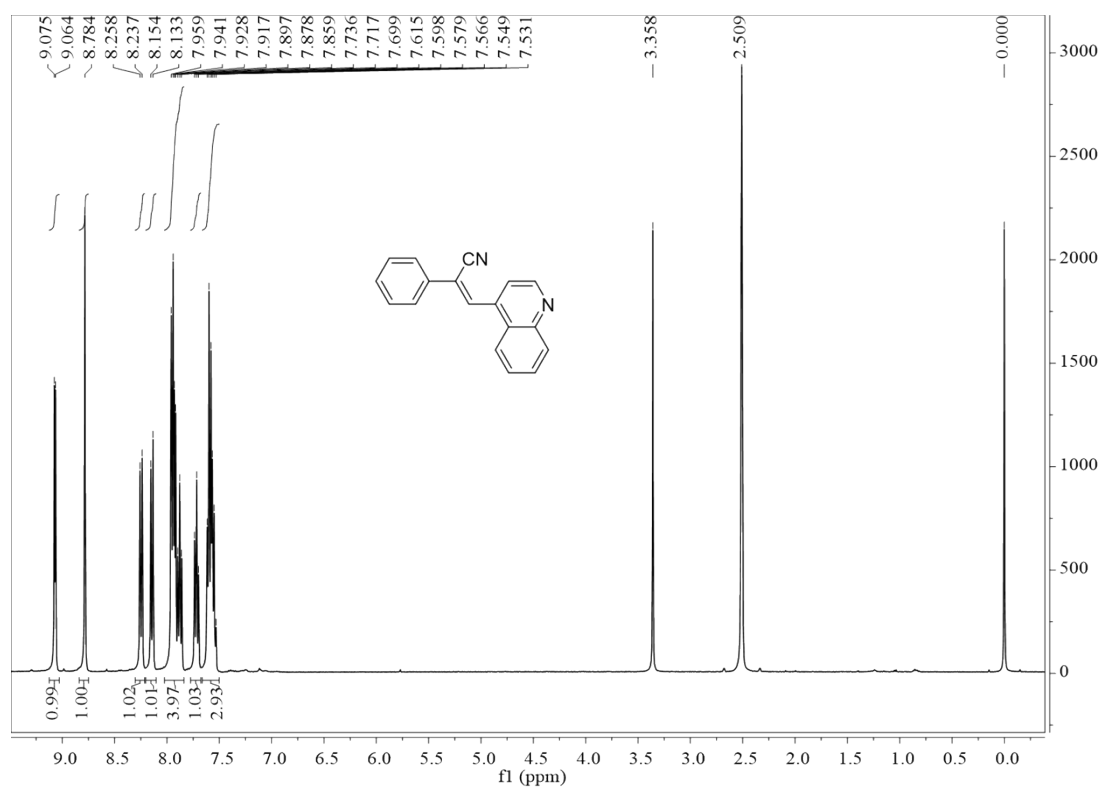

**Figure S32.**  $^1\text{H}$  NMR (400 MHz) spectrum of **1** in  $\text{DMSO-}d_6$ .

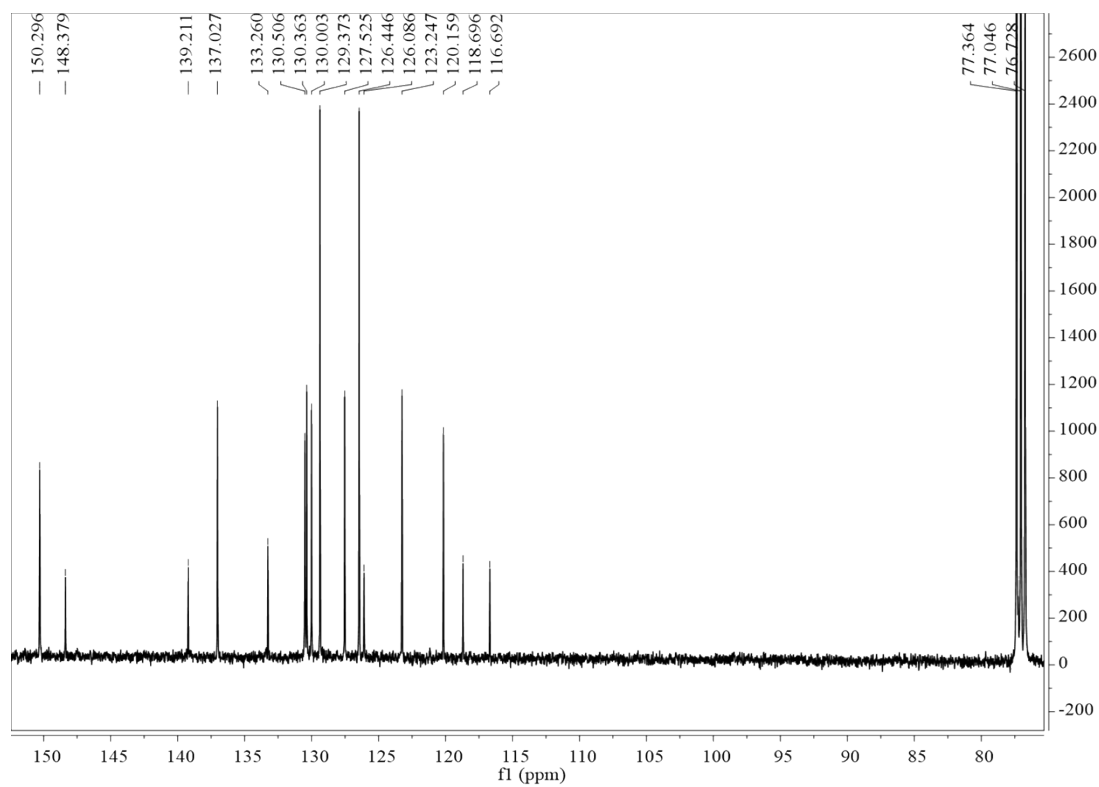

**Figure S33.**  $^{13}\text{C}$  NMR (101 MHz) spectrum of **1** in  $\text{CDCl}_3$ .

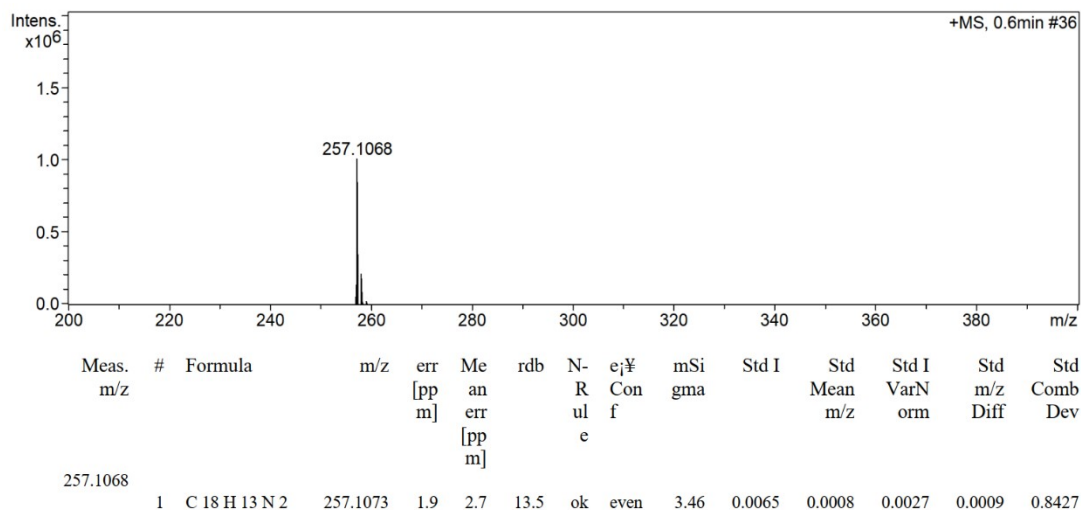

Figure S34. The HRMS spectrum of **1**.

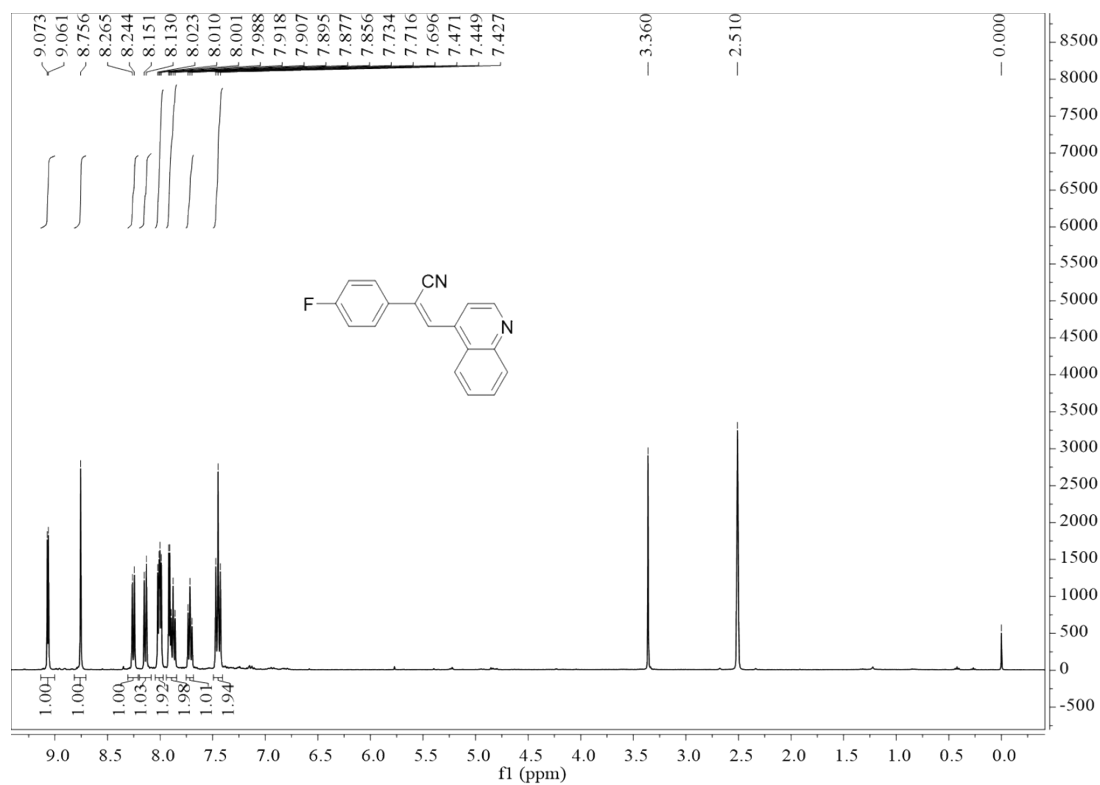

Figure S35. <sup>1</sup>H NMR (400 MHz) spectrum of **2** in DMSO-*d*<sub>6</sub>.

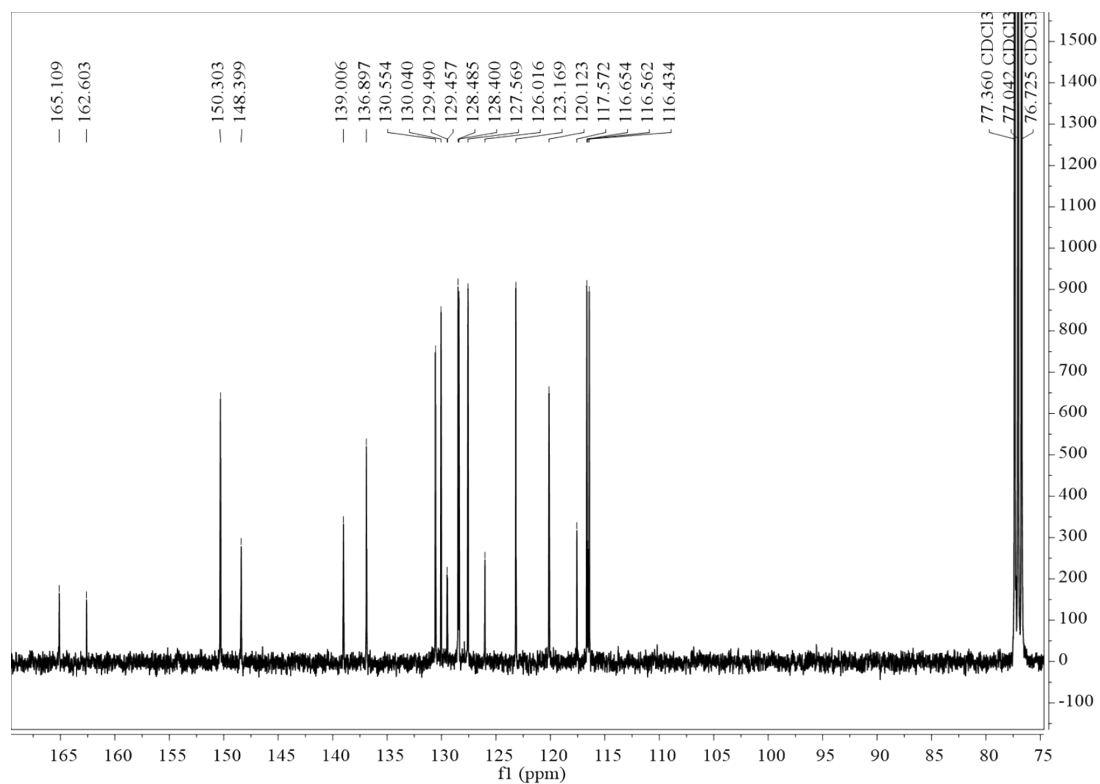

**Figure S36.**  $^{13}\text{C}$  NMR (101 MHz) spectrum of **2** in  $\text{CDCl}_3$ .

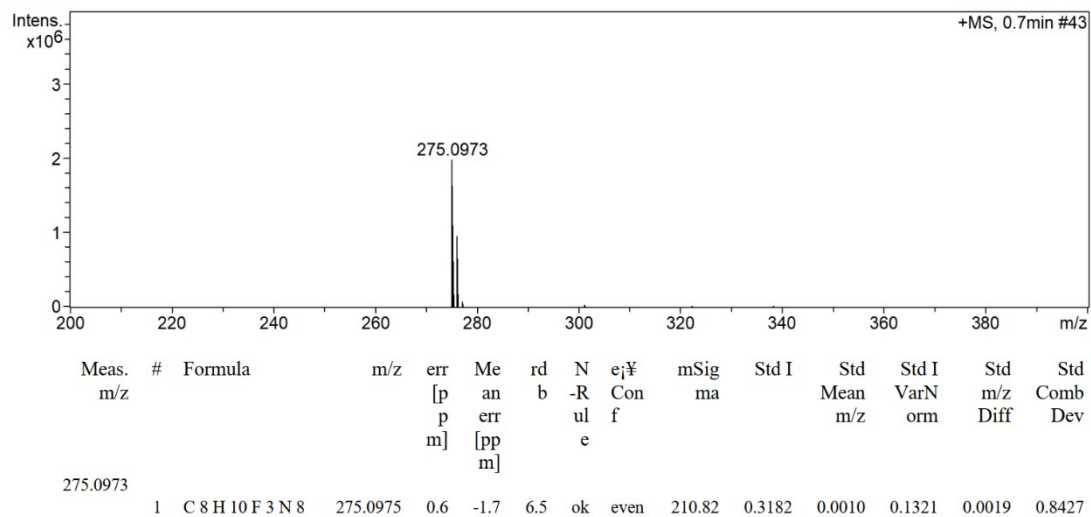

**Figure S37.** The HRMS spectrum of **2**.

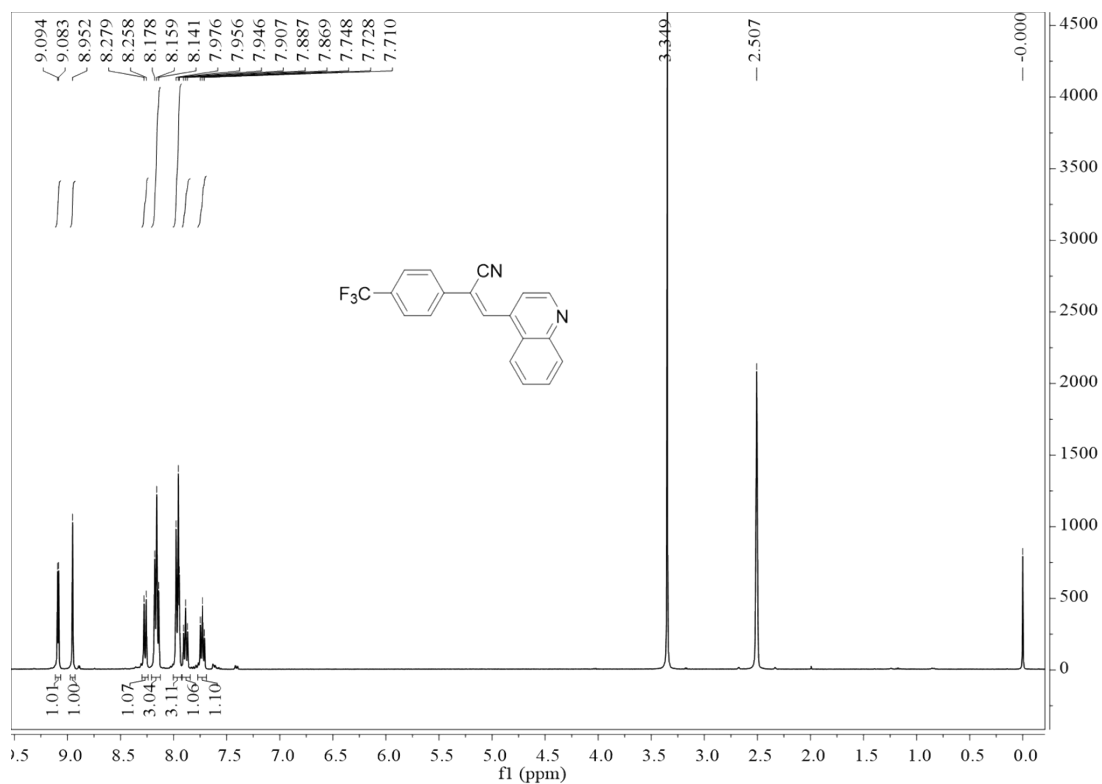

**Figure S38.**  $^1\text{H}$  NMR (400 MHz) spectrum of **3** in  $\text{DMSO-}d_6$ .

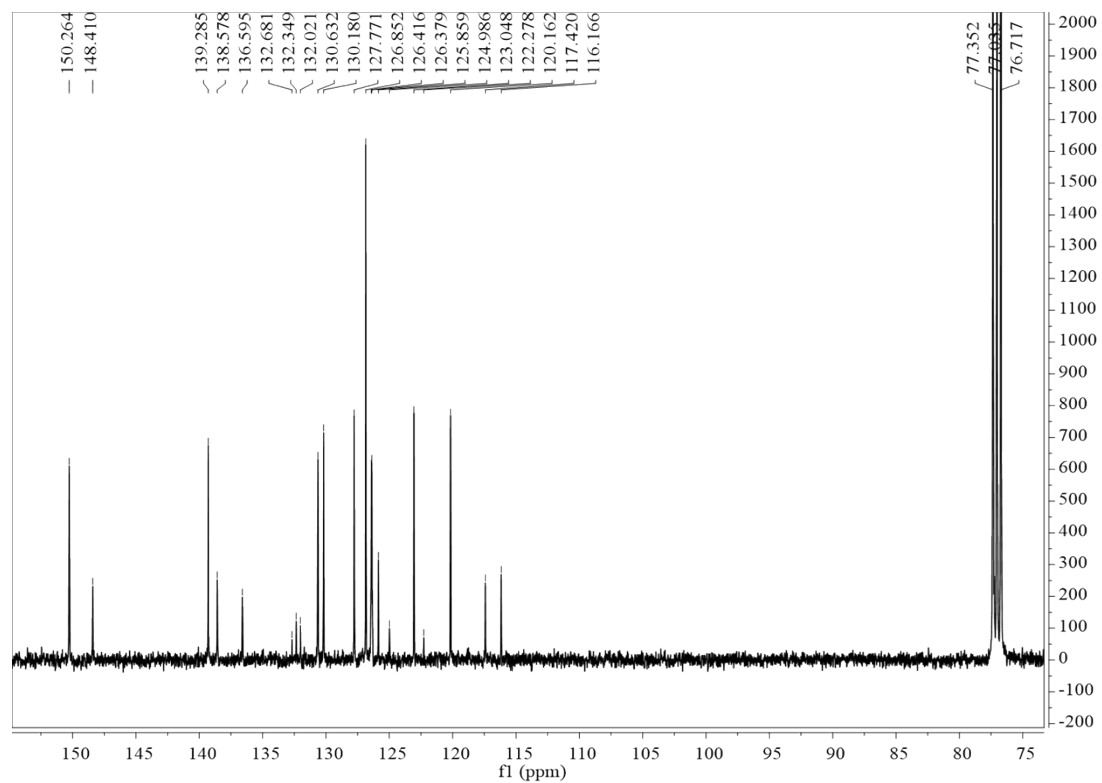

**Figure S39.**  $^{13}\text{C}$  NMR (101 MHz) spectrum of **3** in  $\text{CDCl}_3$ .

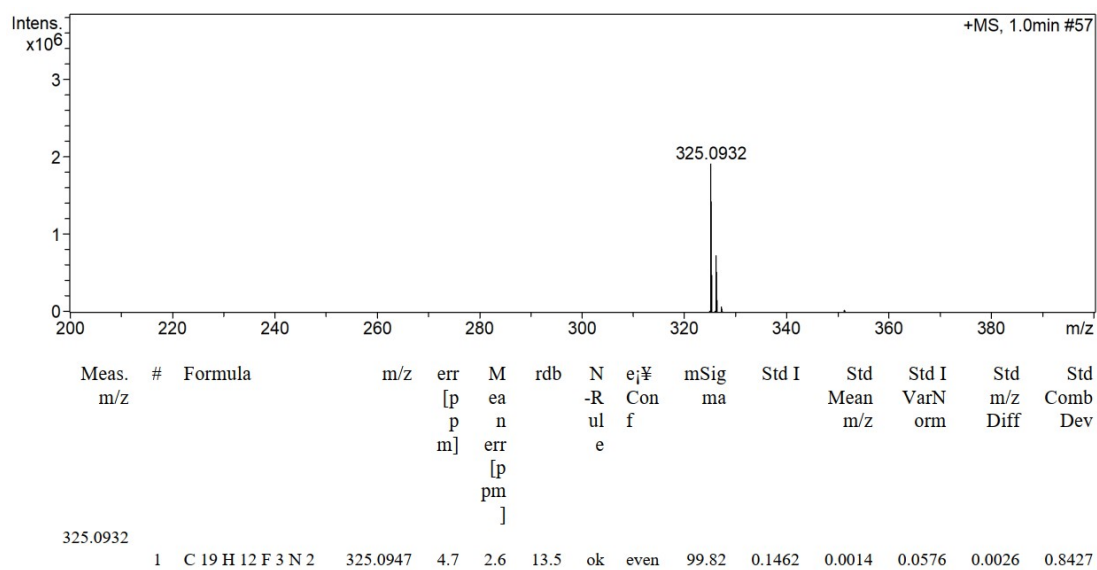

**Figure S40.** The HRMS spectrum of **3**.

## Reference

- 1 Sifain A E, Gifford B J, Gao D W, Lystrom L, Nelson T R, Tretiak S. *J. Phys. Chem. A*, 2018, **122**, 9403-9411.
- 2 Xue P, Ding J, Jin M, Lu R, *J. Mater. Chem. C*, 2017, **5**, 5299-5303.
- 3 Ma Y, Cametti M, Džolić Z, Jiang S. *J. Mater. Chem. C*, 2016, **4**, 10786-10790.
